# Supplementary material for: Cryptochrome-mediated blue-light signalling modulates UVR8 photoreceptor activity and contributes to UV-B tolerance in Arabidopsis
Source: PubMed Central journal article supplement (PMC7067804; doi:10.1038/s41467-020-15133-y), 2020-03-12
Supplement: 41467_2020_15133_MOESM1_ESM.pdf [file 41467_2020_15133_MOESM1_ESM.pdf]

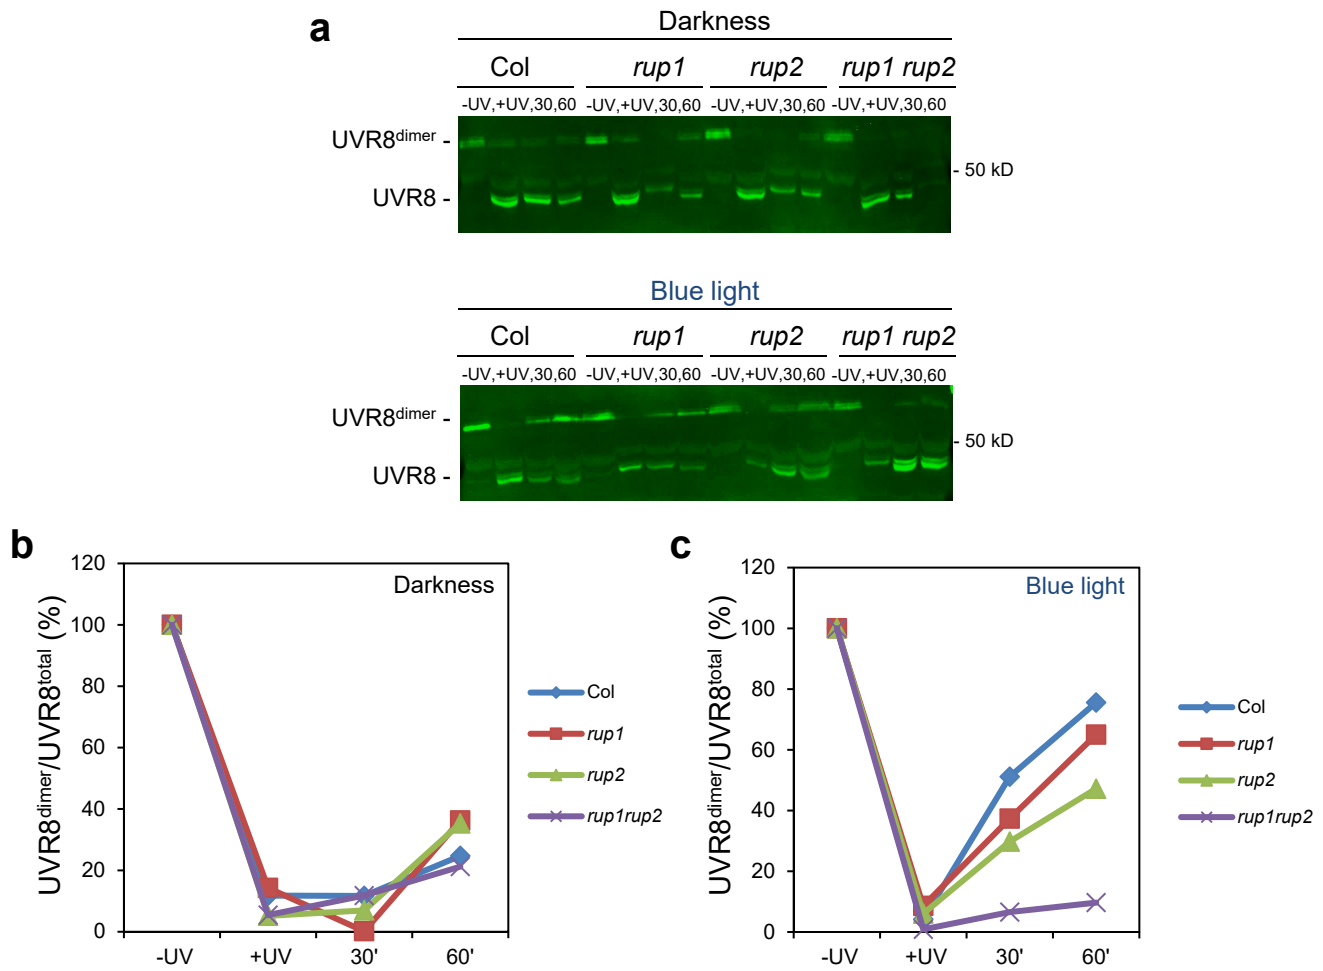

**Supplementary Fig. 1** RUP1 and RUP2 play redundant roles in blue-light enhancement of UVR8 re-dimerization. **a** Immunoblot analysis of UVR8 homodimer and monomer levels (non-heat-denatured samples) in wild-type (Col), *rup1-1* (*rup1*), *rup2-1* (*rup2*) and *rup1-1 rup2-1* (*rup1 rup2*) seedlings immediately prior to UV-B treatment (-UV), immediately following 15-min broadband UV-B treatment, and post-UV-B treatment following 30- and 60-min recovery in darkness (30 and 60, respectively). Seedlings were either pre-treated for 12 h with blue light before the UV-B treatment (Blue light; lower panel) or not (Darkness; upper panel). **b, c** Quantification of the UVR8<sub>dimer</sub>/UVR8<sub>total</sub> ratio (%) in a representative experiment.

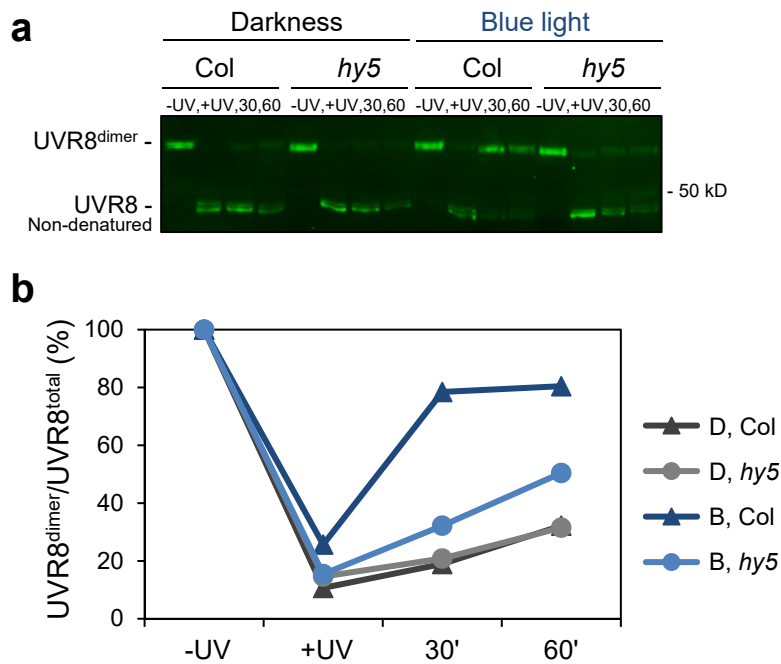

**Supplementary Fig. 2** HY5 is required for the blue light-mediated repression of UVR8 activity. **a** Immunoblot analysis of UVR8 re-dimerization in wild-type (Col) and *hy5-215* (*hy5*) seedlings. UVR8 dimers were detectable in non-heat-denatured protein samples. Parallel denatured samples demonstrated equal amounts of UVR8 protein. The time points for sampling (-UV, +UV, 30' and 60') were as schematically shown in Fig. 2a. **b** Quantification of the UVR8<sup>dimer</sup>/UVR8<sup>total</sup> ratio (%) in response to UV-B in Col and *hy5* seedlings pre-treated with blue light (B) or not (D).

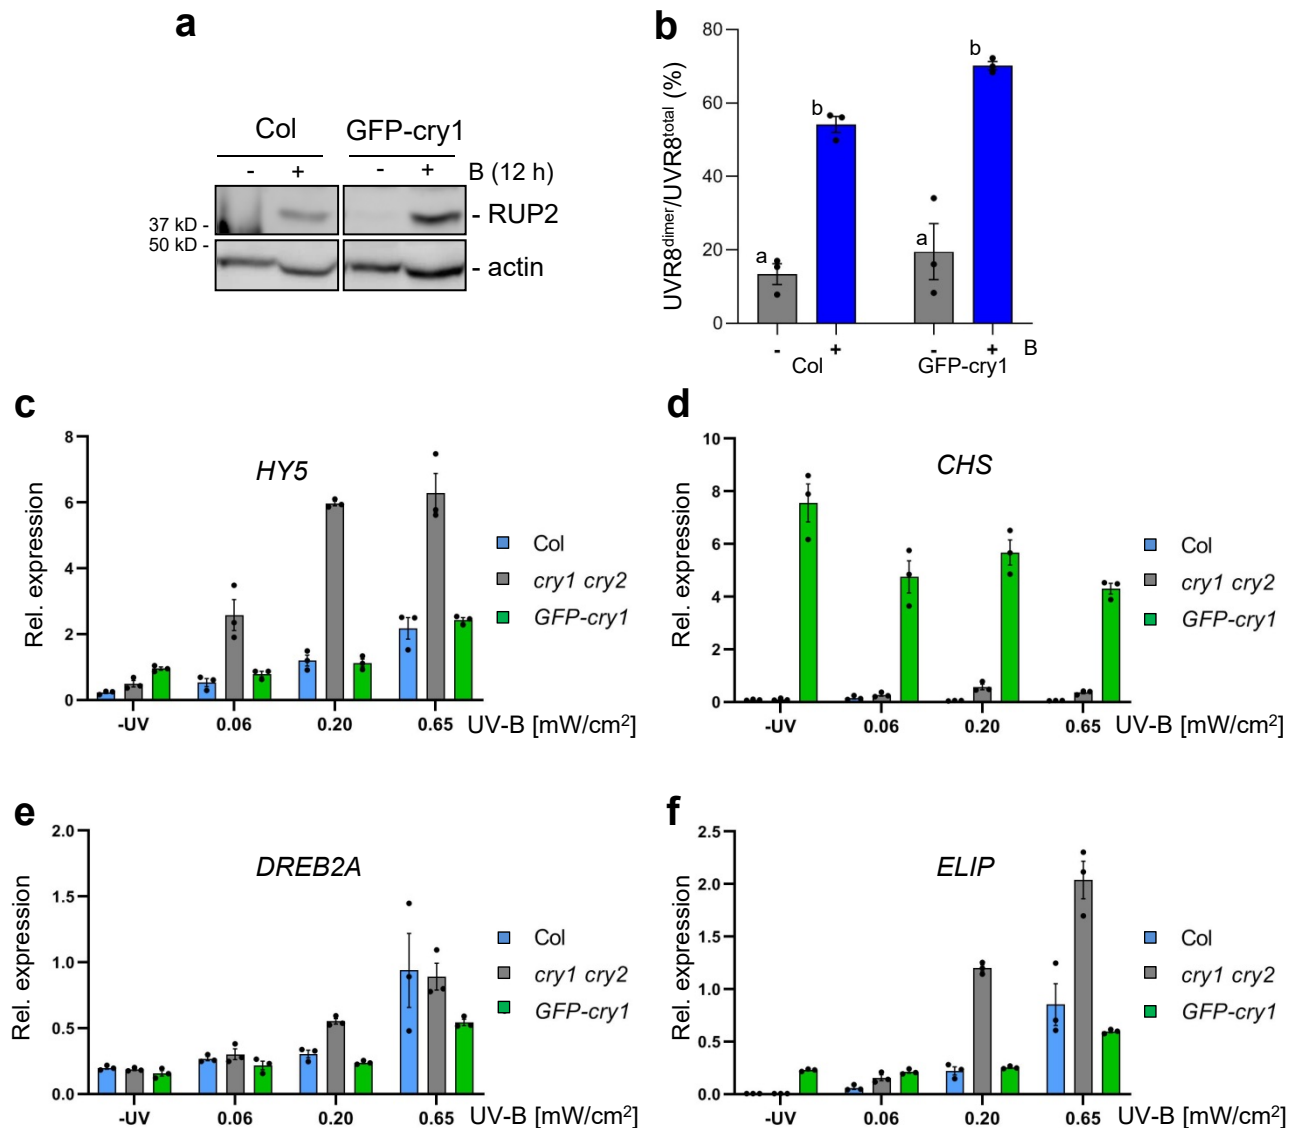

**Supplementary Fig. 3** GFP-*cry1* overexpression enhances blue light-induced RUP2 accumulation and UVR8 re-dimerization. **a** Immunoblot analysis of RUP2 protein level in 4-d-old wild type (Col) and a GFP-*cry1* overexpression line (*cry1/Pro<sub>35S</sub>::GFP-CRY1*) grown in darkness and exposed to 12 h of blue light (+) or not (-). Actin is shown as protein loading control. **b** Quantification of the UVR8<sup>dimer</sup>/UVR8<sup>total</sup> ratio (%) after a 30 min recovery post-UV-B treatment in wild type (Col), *cry1 cry1-304*, and GFP-*cry1* seedlings pre-treated with 12-h blue light or not (darkness). Data are means ± SEM (N = 3). Shared letters indicate no statistically significant difference in the means (P > 0.05; one-way ANOVA followed by post-hoc Tukey test). **c-f** Seven-d-old seedling grown under 12-h light /12-h dark cycles were irradiated for 15 min with broadband UV-B at different intensities (0.06, 0.20, and 0.65 mW cm<sup>-2</sup>) or not (-UV). qRT-PCR analysis of (c) *HY5*, (d) *CHS*, (e) *DREB2A* and (f) *ELIP2* in Col, *cry1 cry2* and *cry1* over expressing line (*cry1/35s::GFP-cry1*) seedlings grown as per the schematic in panel (Fig. 4e). Data are means ± SEM (N = 3).

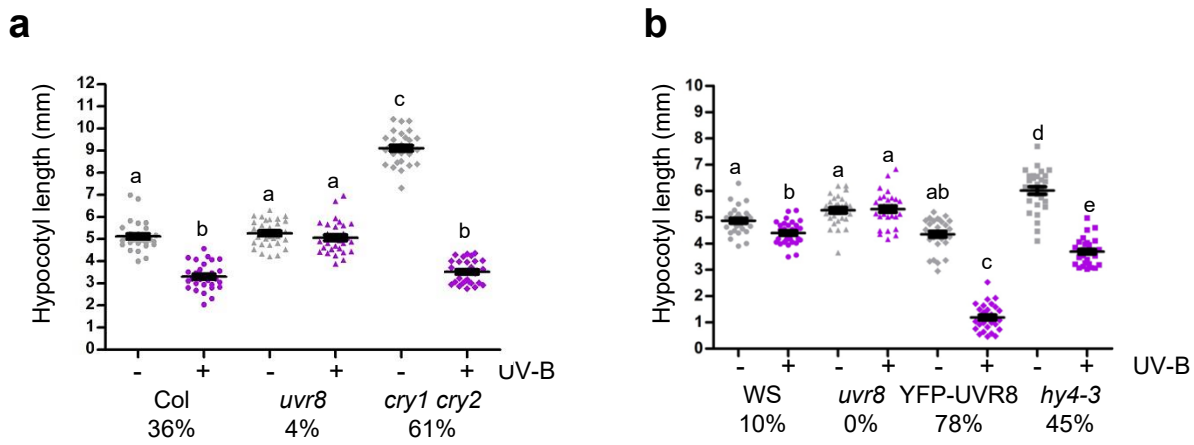

**Supplementary Fig. 4** *cry1* mutants show enhanced UV-B-induced hypocotyl growth inhibition. **a** Quantification of hypocotyl length in 4-d-old wild type (Col), *uvr8-6* (*uvr8*) and *cry1-304 cry2-1* (*cry1 cry2*) seedlings grown in white light ( $3.6 \mu\text{mol m}^{-2} \text{s}^{-1}$ ) supplemented with UV-B (+UV-B;  $0.06 \text{ mW/cm}^2$ ) or not (-UV-B). Data are means  $\pm$  SEM ( $N = 30$ ). Numbers below bars show the relative hypocotyl growth inhibition by UV-B as a percentage. **b** Quantification of hypocotyl length in 4-d-old wild type (Ws), *uvr8-7* (*uvr8*), *uvr8-7/35S::GFP-UVR8* (*GFP-UVR8*) and *hy4-3* (*cry1*) seedlings grown in white light ( $3.6 \mu\text{mol m}^{-2} \text{s}^{-1}$ ) supplemented with UV-B (+UV-B;  $0.015 \text{ mW/cm}^2$ ) or not (-UV-B). Data are means  $\pm$  SEM ( $N = 30$ ). Shared letters indicate no statistically significant difference in the means ( $P > 0.05$ ; one-way ANOVA followed by post-hoc Tukey test).

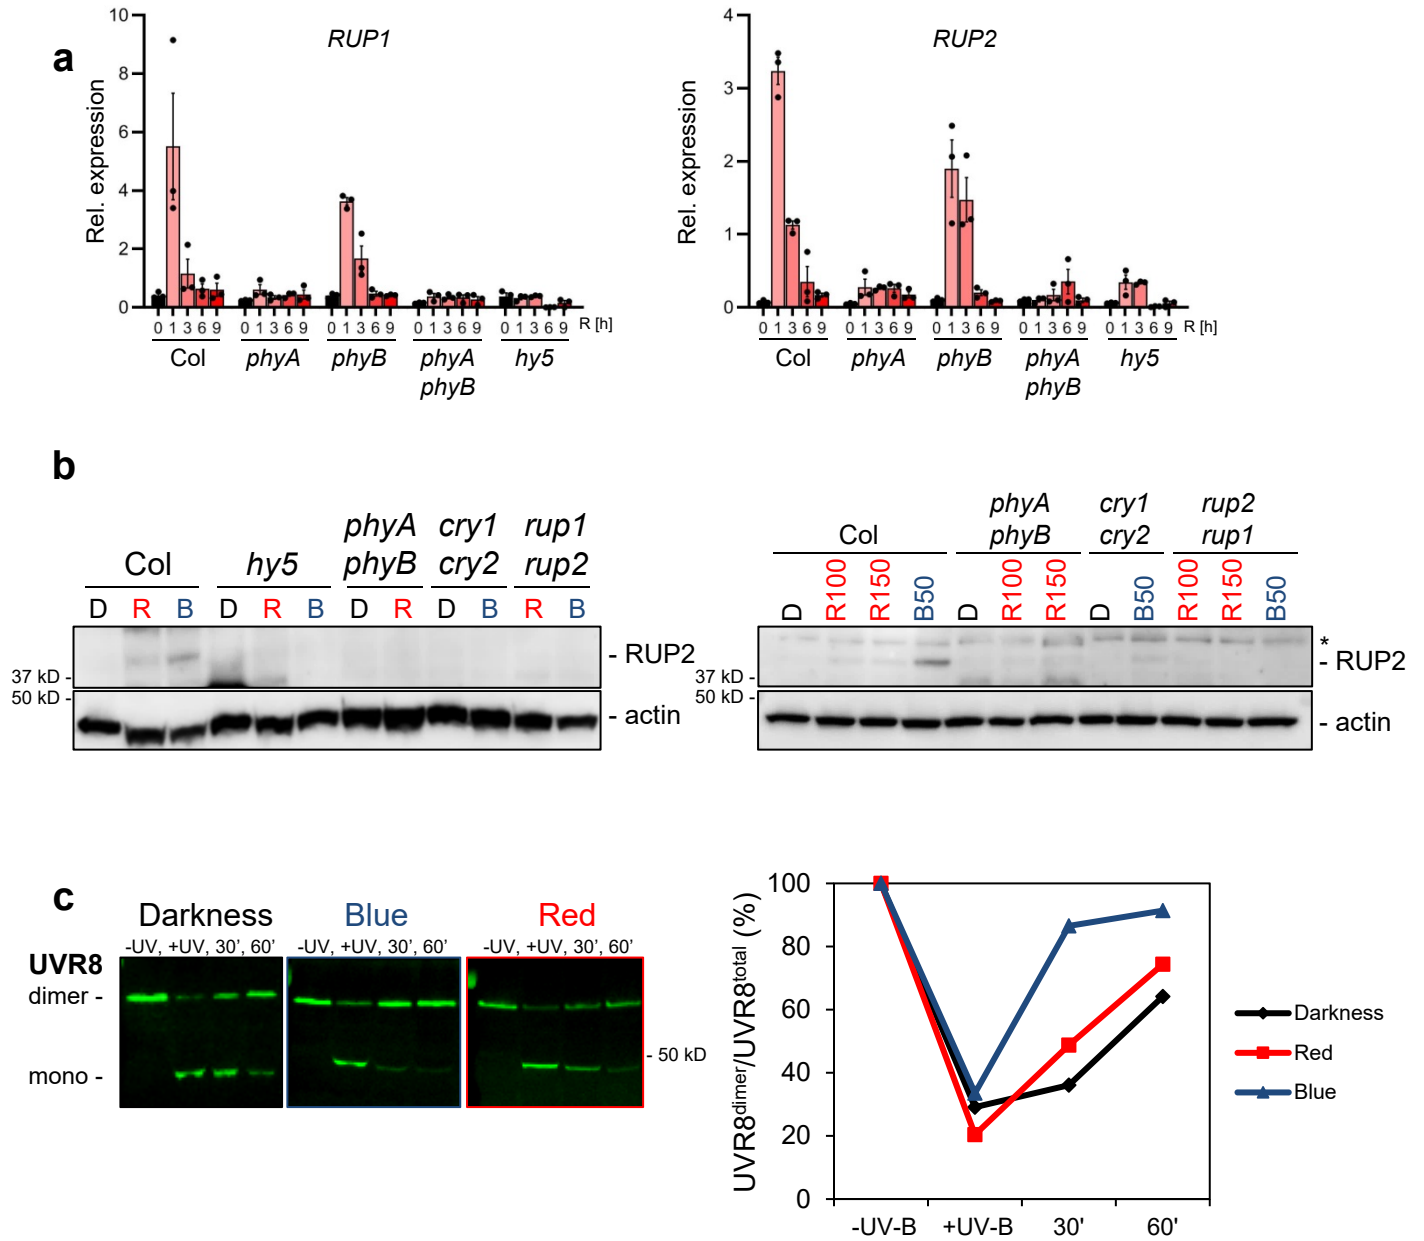

**Supplementary Fig. 5** Red light induction of RUP1 and RUP2 expression, RUP2 protein accumulation, and moderate enhancement of UVR8 re-dimerization. **a** qRT-PCR analysis of *RUP1* and *RUP2* expression in 4-d-old wild-type (Col), *phyA-211* (*phyA*), *phyB-9* (*phyB*), *phyA-211 phyB-9* (*phyA phyB*) and *hy5-215* (*hy5*) seedlings grown in darkness or treated with red light (R; 50  $\mu\text{mol m}^{-2} \text{s}^{-1}$ ) for 1, 3, 6, or 9 h. Data are means  $\pm$  SEM (N = 3). **b** Immunoblot analysis of RUP2 protein level in 4-d-old Col, *hy5-215* (*hy5*) *phyA-211 phyB-9* (*phyA phyB*) *cry1-304 cry2-1* (*cry1 cry2*) and *rup1-1 rup2-1* (*rup1 rup2*) seedlings grown in darkness and exposed to 12 h of 50  $\mu\text{mol m}^{-2} \text{s}^{-1}$  blue light (B) or red light (R) or not (D) in the left panel. Same genotypes seedlings grown in darkness and exposed to 12 h of blue light (Blue 50; 50  $\mu\text{mol m}^{-2} \text{s}^{-1}$ ), red light (Red; 100 and 150  $\mu\text{mol m}^{-2} \text{s}^{-1}$ ) or not (Darkness) in the right panel. Actin is shown as protein loading control. **c** Quantification of the UVR8<sup>dimer</sup>/UVR8<sup>total</sup> ratio (%) in response to UV-B in Col seedlings pre-treated with blue light or red light or not (Darkness).
